# Supplementary material
Source: PubMed Central journal article supplement (PMC6606045)
Supplement: NIHMS1519723-supplement-2.pdf [file NIHMS1519723-supplement-2.pdf]

**Supplementary Table 1.** Frequency of iNKT cells among CD3<sup>+</sup> peripheral blood mononuclear cells cultured for 7 days with 1 µg/ml α-GalCer or vehicle (DMSO)

| Pig ID | iNKT cell frequency (% of CD3 <sup>+</sup> cells) |          | Fold change |
|--------|---------------------------------------------------|----------|-------------|
|        | DMSO                                              | α-GalCer |             |
| Pig 1  | 0.021                                             | 8.00     | 381         |
| Pig 2  | 0.120                                             | 6.00     | 50          |
| Pig 3  | 0.130                                             | 7.85     | 60          |
| Pig 4  | 0.011                                             | 1.24     | 113         |
| Pig 5  | 0.035                                             | 8.40     | 240         |
| Pig 6  | 0.420                                             | 15.40    | 37          |
| Pig 7  | 0.085                                             | 10.20    | 120         |
| Pig 8  | 0.015                                             | 3.56     | 273         |

**Supplementary Table 3.** Interface surface areas ( $\text{\AA}^2$ ) between components of the modeled porcine CD1d- *pTRAV10-pTRBV25*- $\alpha$ -GalCer complex

|                                   | <b>CD1d</b> | <b>V<math>\alpha</math></b> | <b>V<math>\beta</math></b> | <b><math>\alpha</math>-GalCer</b> |
|-----------------------------------|-------------|-----------------------------|----------------------------|-----------------------------------|
| <b>Human</b>                      |             |                             |                            |                                   |
| <b>CD1d</b>                       | -           | 400                         | 310                        | 1040                              |
| <b>V<math>\alpha</math></b>       | 400         | -                           | 830                        | 140                               |
| <b>V<math>\beta</math></b>        | 310         | 830                         | -                          | 0                                 |
| <b><math>\alpha</math>-GalCer</b> | 1040        | 140                         | 0                          | -                                 |
| <b>Pig</b>                        |             |                             |                            |                                   |
| <b>CD1d</b>                       | -           | 400                         | 250                        | 970                               |
| <b>V<math>\alpha</math></b>       | 400         | -                           | 530                        | 160                               |
| <b>V<math>\beta</math></b>        | 250         | 530                         | -                          | 0                                 |
| <b><math>\alpha</math>-GalCer</b> | 970         | 160                         | 0                          | -                                 |
| <b>Mouse</b>                      |             |                             |                            |                                   |
| <b>CD1d</b>                       | -           | 460                         | 200                        | 1030                              |
| <b>V<math>\alpha</math></b>       | 460         | -                           | 680                        | 140                               |
| <b>V<math>\beta</math></b>        | 200         | 680                         | -                          | 0                                 |
| <b><math>\alpha</math>-GalCer</b> | 1030        | 140                         | 0                          | -                                 |

**Supplementary Table 4.** Contact residues for the mouse, human and pig iNKT cell receptor-CD1d interface

| Contact sites in: | Human         | Mouse         | Pig           |
|-------------------|---------------|---------------|---------------|
| CD1d              | Arg79         | Arg79         | Arg106        |
|                   | Asp80         | Asp80         | Asp107        |
|                   | Glu83         | Glu83         | Glu110        |
|                   | Asp151        | Asp151        | Asp178        |
|                   | Phe84         | <b>Leu84</b>  | Phe111        |
|                   | <b>Arg89</b>  | <b>Ser89</b>  | <b>Gly116</b> |
|                   | <b>Gln150</b> | <b>Ala150</b> | <b>Glu177</b> |
| CDR1 $\alpha$     | Pro28         | Pro28         | Pro28         |
|                   | Phe29         | <b>Asp29</b>  | Phe29         |
|                   | <b>Ser30</b>  | Asn30         | Asn30         |
| CDR2 $\beta$      | Tyr48         | Tyr48         | Tyr48         |
|                   | Tyr50         | Tyr50         | Tyr50         |
|                   | Glu56         | Glu56         | Glu56         |
| CDR3 $\alpha$     | <b>Thr98</b>  | <b>Ala98</b>  | <b>Arg98</b>  |

Bold font indicates a residue that is non-conserved compared to the other two species
